# Supplementary material for: Deutschdidaktisches Wissen angehender Sekundarstufenlehrkräfte
Source: Atypon-hosted journal article supplement (doi:10.1026/0012-1924/a000251), 2020-04-01
Supplement: 0012-1924_a000251_esm1.pdf [file 0012-1924_a000251_esm1.pdf]

## Elektronisches Supplement 1

**ESM 1. Tabelle 1.** Beispiel-Testaufgaben zur Erfassung von fachlichem Wissen, Bereich Literaturwissenschaft

| Dimension           | Beispiel-Testaufgabe                                                                                                                                                                                                                                                                                             | Lösung/mögliche korrekte Antwort                                 |
|---------------------|------------------------------------------------------------------------------------------------------------------------------------------------------------------------------------------------------------------------------------------------------------------------------------------------------------------|------------------------------------------------------------------|
| Literaturgeschichte | Ordnen Sie die folgenden Epochenbezeichnungen von oben (früheste) nach unten (späteste).<br>Expressionismus, Romantik, Barock, Aufklärung, (Poetischer oder bürgerlicher) Realismus                                                                                                                              | Barock<br>Aufklärung<br>Romantik<br>Realismus<br>Expressionismus |
| Gattungen           | In einer Erzählung, in der es um eine „unerhörte Begebenheit“ geht, spielt ein Falke eine wichtige Rolle. Diese Erzählung kann als ein „Prototyp“ einer literarischen (Unter-) Gattung angesehen werden. Um welche (Unter-) Gattung handelt es sich?<br>A. Kurzgeschichte<br>B. Sage<br>C. Parabel<br>D. Novelle | Novelle                                                          |

**ESM 1. Tabelle 2.** Beispiel-Testaufgaben zur Erfassung von fachlichem Wissen, Bereich Linguistik

| Dimension   | Beispiel-Testaufgabe                                                                                                                                                                             | Lösung/mögliche korrekte Antwort                          |
|-------------|--------------------------------------------------------------------------------------------------------------------------------------------------------------------------------------------------|-----------------------------------------------------------|
| Syntax      | Der folgende Satz ist mehrdeutig. Zeigen Sie das, indem Sie Bezeichnungen für Satzglieder verwenden.<br><i>Corinna hat sich in Barcelona verliebt.</i><br>Bitte notieren Sie eine kurze Antwort. |                                                           |
| Morphologie | Welche der folgenden Wortarten sind flektierbar, welche nicht?<br>Adjektive<br>Pronomen<br>Konjunktionen<br>Artikel(wörter)<br>Präpositionen<br>Adverbien                                        | Flektierbar sind Adjektive, Pronomen und Artikel(wörter). |

**ESM 1. Tabelle 3.** Beispiel-Testaufgaben zur Erfassung von pädagogischem Wissen

| Dimension | Beispiel-Testaufgabe | Lösung / Mögliche Korrekte Lösungsantwort |
|-----------|----------------------|-------------------------------------------|
|           |                      |                                           |

---

|                          |                                                                                                                                                                                                                                                                                                                                                                                                                                                                                                                                                                                                                                                                                        |                                                                               |
|--------------------------|----------------------------------------------------------------------------------------------------------------------------------------------------------------------------------------------------------------------------------------------------------------------------------------------------------------------------------------------------------------------------------------------------------------------------------------------------------------------------------------------------------------------------------------------------------------------------------------------------------------------------------------------------------------------------------------|-------------------------------------------------------------------------------|
| Motivation               | <p>Bei welchen der folgenden Fälle handelt es sich um eine <u>intrinsische</u> Motivation, bei welchen um eine <u>extrinsische</u> Motivation?<br/> <i>Kreuzen Sie <u>ein Kästchen pro Zeile</u> an.</i></p> <p style="text-align: center;">Intrinsische Motivation / Extrinsische Motivation</p> <p>Ein Schüler lernt vor einer Mathematikarbeit, weil er...</p> <p>A. für eine gute Note eine Belohnung erwartet.</p> <p>B. einen Tadel für eine schlechte Note vermeiden möchte.</p> <p>C. an mathematischen Problemen interessiert ist.</p> <p>D. seine Eltern nicht enttäuschen möchte.</p> <p>E. seine gute Leistungsposition in der Klasse auch in Zukunft behalten möchte.</p> | <p>Intrinsische Motivation: C;</p> <p>Extrinsische Motivation: A, B, D, E</p> |
| <hr/>                    |                                                                                                                                                                                                                                                                                                                                                                                                                                                                                                                                                                                                                                                                                        |                                                                               |
| Umgang mit Heterogenität | <p>Nennen Sie <u>drei</u> Unterrichtskonzepte bzw. Unterrichtsmethoden, die es den Schüler(inne)n grundsätzlich ermöglichen, über die Differenzierung im Unterricht <u>mit zu entscheiden</u>.</p> <p>1)</p> <p>2)</p> <p>3)</p>                                                                                                                                                                                                                                                                                                                                                                                                                                                       | <p>1) Wochenplan</p> <p>2) Stationenlernen</p> <p>3) Lernbuffet</p>           |

---
