# Supplementary material for: Deutschdidaktisches Wissen angehender Sekundarstufenlehrkräfte
Source: Atypon-hosted journal article supplement (doi:10.1026/0012-1924/a000251), 2020-04-01
Supplement: 0012-1924_a000251_esm2.pdf [file 0012-1924_a000251_esm2.pdf]

## Elektronisches Supplement 2

**ESM 2. Tabelle 1.** Kennwerte aus der Skalierung des Tests zur Erfassung von Fachwissen Deutsch und Pädagogischem Wissen

|                                               | Fachwissen<br>Deutsch    |                                 |            | Pädagogisches<br>Wissen |
|-----------------------------------------------|--------------------------|---------------------------------|------------|-------------------------|
|                                               | Gesamt<br>(n = 264)      | Gesamt<br>(n = 264)             |            | Gesamt<br>(n = 378)     |
| Modell                                        | Eindi-<br>mensio-<br>nal | Zweidimensional                 |            |                         |
|                                               |                          | Literatur-<br>wissen-<br>schaft | Linguistik |                         |
| Abweichung                                    | 14489.79                 | 14383.30                        |            |                         |
| Zahl der geschätzten Parameter                | 49                       | 51                              |            |                         |
| Latente Interkorrelation der Dimen-<br>sionen |                          | .63                             |            |                         |
| Item-Anzahl                                   | 48                       | 24                              | 24         |                         |
| $\alpha$                                      | .82                      | a)                              | a)         | .71                     |
| EAP-Reliabilität                              | .83                      | .75                             | .78        | .68                     |
| Theta-Varianz                                 | .49                      | .49                             | .83        | .29                     |
| Weighted Mean Square (min.–max.)              | .89–1.15                 | .94–1.14                        | .93–1.15   | .95–1.19                |
| Item-Discrimination (Mittelwert)              | .32                      | .31                             | .33        | .29                     |

Anmerkung: <sup>a)</sup> Kennwerte werden nur für das eindimensionale Modell ausgegeben.
