# Supplementary material for: Deutschdidaktisches Wissen angehender Sekundarstufenlehrkräfte
Source: Atypon-hosted journal article supplement (doi:10.1026/0012-1924/a000251), 2020-04-01
Supplement: 0012-1924_a000251_esm3.pdf [file 0012-1924_a000251_esm3.pdf]

### Elektronisches Supplement 3

**ESM 3. Tabelle 1.** Kennwerte der Item-Parcels des Tests zum Fachwissen Deutsch ( $n = 264$ )

|                  | Literaturwissenschaft |                      |           |                   | Linguistik          |              |        |                      |
|------------------|-----------------------|----------------------|-----------|-------------------|---------------------|--------------|--------|----------------------|
|                  | Form-analyse          | Literatur-geschichte | Gattungen | Figurenre-de u.a. | Phonetik/Phonologie | Morpho-logie | Syntax | Seman-tik/Prag-matik |
| Anzahl der Items | 6                     | 7                    | 6         | 5                 | 6                   | 5            | 7      | 6                    |
| $\alpha$         | .28                   | .60                  | .54       | .29               | .45                 | .44          | .62    | .34                  |
| $M$              | .49                   | .54                  | .34       | .28               | .37                 | .25          | .36    | .30                  |
| $SD$             | .21                   | .32                  | .26       | .22               | .24                 | .23          | .25    | .21                  |
| $SE$             | .01                   | .02                  | .02       | .01               | .01                 | .02          | .02    | .01                  |

**ESM 3. Tabelle 2.** Kennwerte der Item-Parcels des Tests zum pädagogischen Wissen ( $n = 378$ )

|                  | Umgang mit Hete-rogenität | Strukturierung von Unterricht | Klassenführung/Motivierung | Leistungsbeurtei-lung |
|------------------|---------------------------|-------------------------------|----------------------------|-----------------------|
| Anzahl der Items | 12                        | 13                            | 9                          | 6                     |
| $\alpha$         | .49                       | .58                           | .30                        | .68                   |
| $M$              | .67                       | .67                           | .76                        | .56                   |
| $SD$             | .16                       | .17                           | .15                        | .42                   |
| $SE$             | .01                       | .01                           | .01                        | .02                   |
