# Supplementary material for: Deutschdidaktisches Wissen angehender Sekundarstufenlehrkräfte
Source: Atypon-hosted journal article supplement (doi:10.1026/0012-1924/a000251), 2020-04-01
Supplement: 0012-1924_a000251_esm4.pdf [file 0012-1924_a000251_esm4.pdf]

## Elektronisches Supplement 4

Die Tabelle 1 enthält die mithilfe von *Mplus* geschätzten Interkorrelationen aller Item-Parcels der drei verwendeten Tests zur Erfassung des Fachwissens Deutsch, des deutschdidaktischen Wissens und des pädagogischen Wissens.

**ESM 4. Tabelle 1.** Interkorrelationen der Item-Parcels der Tests zum Fachwissen Deutsch, zum deutschdidaktischen Wissen und zum pädagogischen Wissen ( $n = 378$ ), Spalte 1 bis Spalte 7

|      |      | (1)    | (2)    | (3)    | (4)    | (5)    | (6)    | (7)    |
|------|------|--------|--------|--------|--------|--------|--------|--------|
| (1)  | FW11 |        |        |        |        |        |        |        |
| (2)  | FW12 | .31*** |        |        |        |        |        |        |
| (3)  | FW13 | .22*** | .47*** |        |        |        |        |        |
| (4)  | FW14 | .30*** | .21*** | .22*** |        |        |        |        |
| (5)  | FW21 | .27*** | .20**  | .30*** | .15**  |        |        |        |
| (6)  | FW22 | .33*** | .20**  | .28*** | .26*** | .43*** |        |        |
| (7)  | FW23 | .42*** | .17**  | .23*** | .31*** | .38*** | .48*** |        |
| (8)  | FW24 | .27*** | .11    | .23*** | .26*** | .34*** | .42*** | .46*** |
| (9)  | FDW1 | .12*   | -.04   | -.02   | .18**  | .12*   | .15*   | .11    |
| (10) | FDW2 | .10    | .00    | .07    | .09    | .04    | .12    | .22*** |
| (11) | FDW3 | .20*** | .00    | .03    | .20**  | .25*** | .33*** | .35*** |
| (12) | FDW4 | .19**  | .00    | .04    | .17**  | .23*** | .21*** | .31*** |

|      |      |       |      |      |      |       |        |        |
|------|------|-------|------|------|------|-------|--------|--------|
| (13) | FDW5 | .12*  | .09  | .02  | .04  | .15** | .24*** | .32*** |
| (14) | PW1  | .03   | .01  | .00  | .02  | .08   | .19**  | .12    |
| (15) | PW2  | .12   | -.09 | -.03 | .06  | .10   | .12*   | .22*** |
| (16) | PW3  | .04   | -.03 | .00  | -.01 | -.05  | -.04   | .09    |
| (17) | PW4  | .20** | -.03 | .02  | .09  | .09   | .13*   | .14*   |

*Anmerkungen:* FW11 = Literaturwissenschaft/Formanalyse; FW12 = Literaturwissenschaft/Literaturgeschichte; FW13 = Literaturwissenschaft/Gattungen; FW14 = Literaturwissenschaft/Figurenrede u.a.; FW21 = Linguistik/Phonetik/Phonologie; FW22 = Linguistik/Morphologie; FW23 = Syntax; FW24 = Semantik/Pragmatik; FDW1 = Sprechen und Zuhören; FDW2 = Schreiben; FDW3 = Rechtschreiben; FDW4 = Lesen; FDW5 = Sprache und Sprachgebrauch reflektieren; PW1 = Umgang mit Heterogenität; PW2 = Strukturierung von Unterricht; PW3 = Klassenführung/Motivierung; PW4 = Leistungsbeurteilung. \*\*\*  $p < .001$ , \*\*  $p < .01$ , \*  $p < .05$ .

**ESM 4. Tabelle 2.** Interkorrelationen der Item-Parcels der Tests zum Fachwissen Deutsch, zum deutschdidaktischen Wissen und zum pädagogischen Wissen ( $n = 378$ ), Spalte 8 bis Spalte 16

|      |      | (8)    | (9)    | (10)   | (11)   | (12) | (13) | (14) | (15) | (16) |
|------|------|--------|--------|--------|--------|------|------|------|------|------|
| (1)  | FW11 |        |        |        |        |      |      |      |      |      |
| (2)  | FW12 |        |        |        |        |      |      |      |      |      |
| (3)  | FW13 |        |        |        |        |      |      |      |      |      |
| (4)  | FW14 |        |        |        |        |      |      |      |      |      |
| (5)  | FW21 |        |        |        |        |      |      |      |      |      |
| (6)  | FW22 |        |        |        |        |      |      |      |      |      |
| (7)  | FW23 |        |        |        |        |      |      |      |      |      |
| (8)  | FW24 |        |        |        |        |      |      |      |      |      |
| (9)  | FDW1 | .15*   |        |        |        |      |      |      |      |      |
| (10) | FDW2 | .18**  | .08    |        |        |      |      |      |      |      |
| (11) | FDW3 | .30*** | .16**  | .20*** |        |      |      |      |      |      |
| (12) | FDW4 | .21*** | .27*** | .25*** | .24*** |      |      |      |      |      |

|      |      |        |        |        |        |        |        |        |        |        |
|------|------|--------|--------|--------|--------|--------|--------|--------|--------|--------|
| (13) | FDW5 | .21*** | .21*** | .23*** | .33*** | .31*** |        |        |        |        |
| (14) | PW1  | .13*   | .14*   | .22*** | .19*** | .17**  | .29*** |        |        |        |
| (15) | PW2  | .16*   | .25*** | .12*   | .21*** | .28*** | .32*** | .24*** |        |        |
| (16) | PW3  | .03    | .16**  | .20*** | .14**  | .12*   | .15**  | .29*** | .25*** |        |
| (17) | PW4  | .01    | .16**  | .19*** | .08    | .12*   | .16**  | .19**  | .21*** | .24*** |

*Anmerkungen:* FW11 = Literaturwissenschaft/Formanalyse; FW12 = Literaturwissenschaft/Literaturgeschichte; FW13 = Literaturwissenschaft/Gattungen; FW14 = Literaturwissenschaft/Figurenrede u.a.; FW21 = Linguistik/Phonetik/Phonologie; FW22 = Linguistik/Morphologie; FW23 = Syntax; FW24 = Semantik/Pragmatik; FDW1 = Sprechen und Zuhören; FDW2 = Schreiben; FDW3 = Rechtschreiben; FDW4 = Lesen; FDW5 = Sprache und Sprachgebrauch reflektieren; PW1 = Umgang mit Heterogenität; PW2 = Strukturierung von Unterricht; PW3 = Klassenführung/Motivierung; PW4 = Leistungsbeurteilung. \*\*\*  $p < .001$ , \*\*  $p < .01$ , \*  $p < .05$ .
